# Supplementary material for: Crystal Structure and Biochemical Analysis of a Cytochrome P450 Steroid Hydroxylase (BaCYP106A6) from Bacillus Species
Source: J Microbiol Biotechnol. 2022 Dec 12;33(3):387–97. doi: 10.4014/jmb.2211.11031 (PMC10084758; doi:10.4014/jmb.2211.11031)

## Supplementary Figures

### Crystal structure and biochemical analysis of a cytochrome P450 steroid hydroxylase (*BaCYP106A6*) from *Bacillus* species

Ki-Hwa Kim<sup>1†</sup>, Hackwon Do<sup>2,3†</sup>, Chang Woo Lee<sup>2†</sup>, Pradeep Subedi<sup>1</sup>, Miyoung Choi<sup>4</sup>, Yewon Nam<sup>2</sup>, Jun Hyuck Lee<sup>2,3</sup>, and Tae-Jin Oh<sup>1,4,5\*</sup>

<sup>1</sup>Department of Life Science and Biochemical Engineering, Sunmoon University, Asan 31460, Republic of Korea

<sup>2</sup>Research Unit of Cryogenic Novel Materials, Korea Polar Research Institute, Incheon 21990, Republic of Korea

<sup>3</sup>Department of Polar Sciences, University of Science and Technology, Incheon 21990, Republic of Korea.

<sup>4</sup>Department of Pharmaceutical Engineering and Biotechnology, Sunmoon University, Asan 31460, Republic of Korea.

<sup>5</sup>Genome-based BioIT Convergence Institute, Asan 31460, Republic of Korea.

<sup>†</sup>These authors contributed equally to this work.

#### \*Correspondence

Dr. Jun Hyuck Lee,

E-mail: [tjoh3782@sunmoon.ac.kr](mailto:tjoh3782@sunmoon.ac.kr).

**Figure S1.** Characterization of purified *BaCYP106A6*. **(A)** The UV-visible spectrum of *BaCYP106A6*. The spectrum of the oxidized ferric form of CYP106A6 is shown. Insets show enzymes purified by SDS-PAGE with protein markers. **(B)** The three states of *BaCYP106A6*. The solid line indicates the oxidized ferric ( $\text{Fe}^{+3}$ ) state of the heme iron of *BaCYP106A6*, whereas the long-dotted line indicates ferrous ( $\text{Fe}^{+2}$ ) derived from the addition of sodium dithionite. The short-dotted line represents the result of adding carbon monoxide to the heme iron.

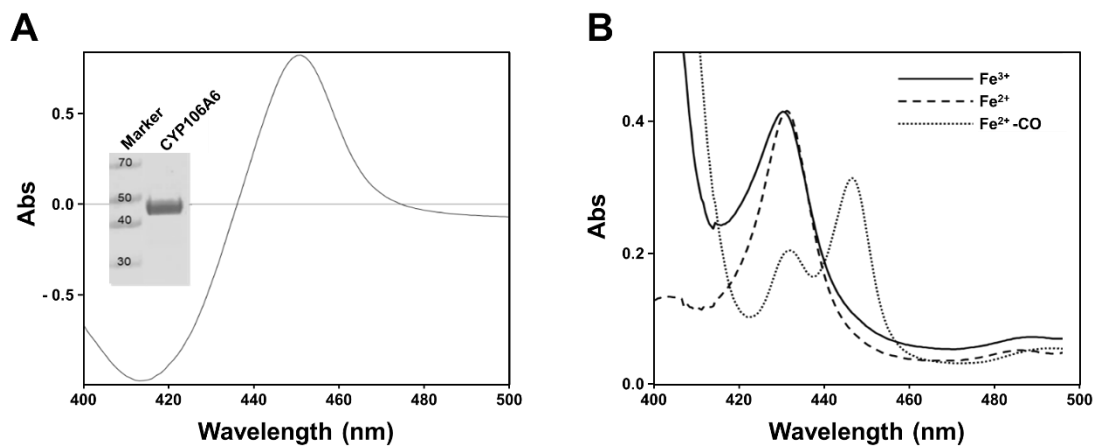

**Figure S2.** Spectral determination of interaction between steroids and *BaCYP106A6*. The steroids were diluted in the range of 0–500  $\mu\text{M}$  and used for the assay. The UV-visible absorbance spectra were measured between 350 and 500 nm in the presence of different concentrations of steroids and plotted in different colors. The concentration of *BaCYP106A6* was 1  $\mu\text{M}$  in 50 mM potassium buffer (pH 7.4).

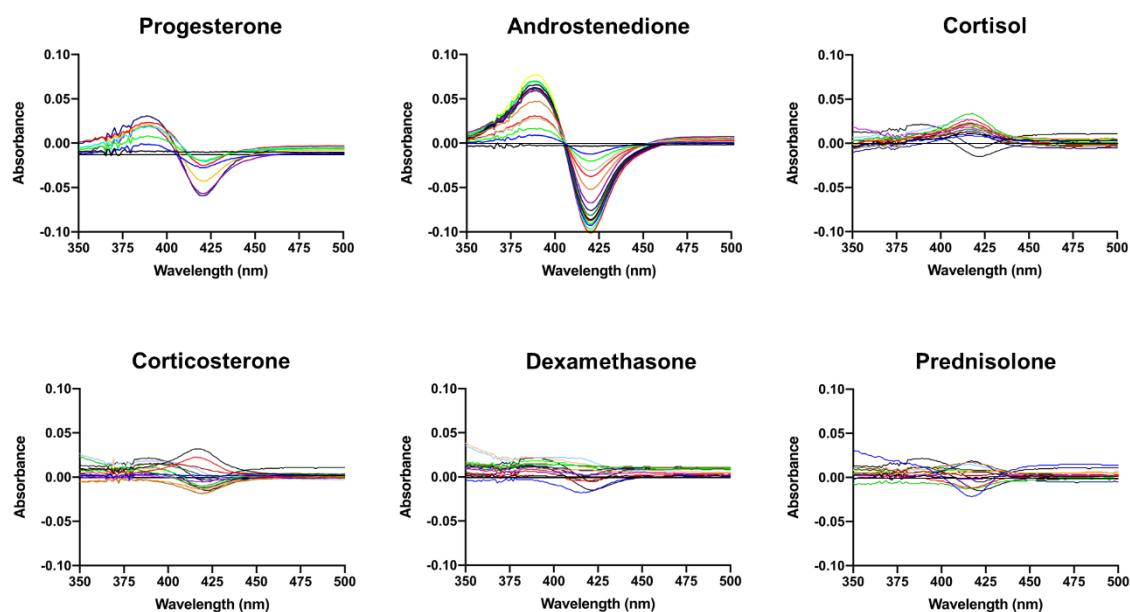

**Figure S3** Oligomeric state of *BaCYP106A6*. **(A)** Size-exclusion chromatography of *BaCYP106A6* was performed at 280 nm. A Superdex 200 10/300 GL column connected to an Ä KTA Avant system (Cytiva, Marlborough, MA, USA) was used. **(B)** The protein standard mix ranged from 15 to 600 kDa (cat. No. 69385-30MG; Sigma-Aldrich) was used to generate a standard curve under the same conditions. The calculated molecular mass of *BaCYP106A6* was 46.8 kDa.

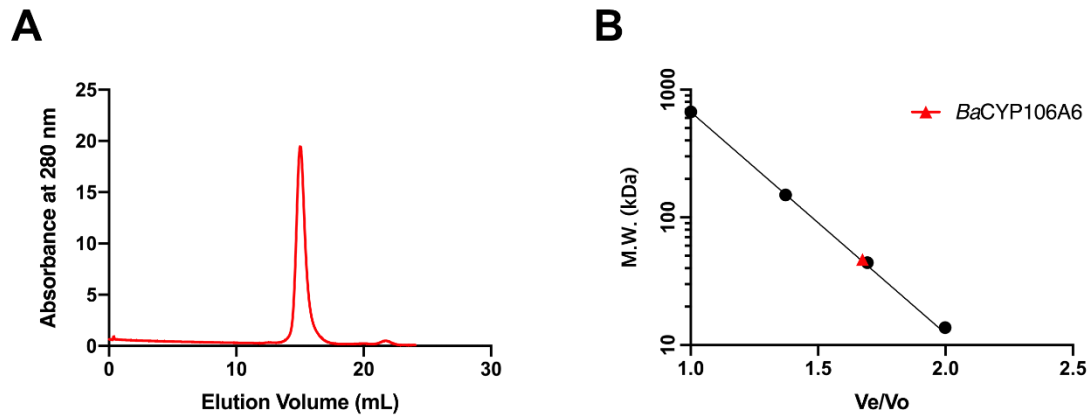

**Figure S4** Stereo view of the *Ba*CYP106A6 structure centered in the substrate-binding pocket. The  $2Fo-Fc$  electron-density map (contoured at  $1\sigma$ ) around Arg295 is shown.

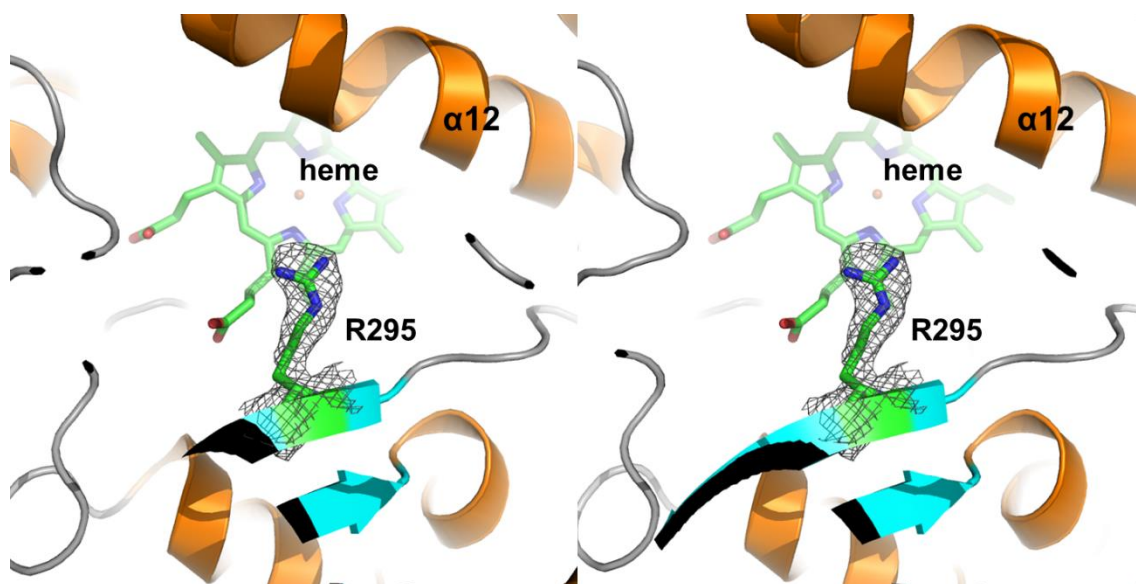

Supplement: Supplementary file 1 [file jmb-33-3-387-supple.pdf]
